# Supplementary material
Source: PubMed Central journal article supplement (PMC3044241)
Supplement: NIHMS265367-supplement-1.pdf [file NIHMS265367-supplement-1.pdf]

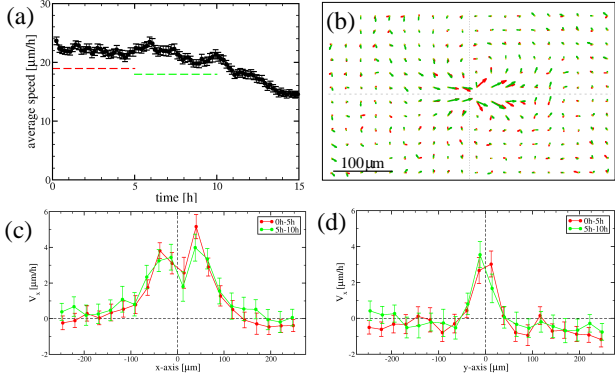

Supplementary Figure 1: Stability of flow field calculations in a high cell density HUVEC culture. The graph (a) shows average cell velocities during the recording (error bars indicate the standard error of the mean). Flow fields  $\mathbf{V}(\mathbf{x})$ , calculated from the first and second five hours, are depicted in red and green, respectively (b). The parallel component of  $\mathbf{V}(\mathbf{x})$  along the parallel (c) and orthogonal (d) axes demonstrate the similarity of the two flow fields.
